## 27 **Abstract**

28 COVID-19 pandemic has accelerated the development of vaccines against its etiologic  
29 agent, SARS-CoV-2. However, the emergence of new variants of the virus requires new  
30 immunization strategies in addition to the current vaccines approved for human  
31 administration. In the present report, the immunological and safety evaluation in mice  
32 and hamsters of a subunit vaccine based on the RBD sub-domain with two adjuvants of  
33 oil origin is described.

34 The RBD protein was expressed in insect cells and purified by chromatography until  
35 >95% purity. The protein was shown to have the appropriate folding as determined by  
36 ELISA and flow cytometry binding assays to its receptor, as well as by its detection by  
37 hamster immune anti-S1 sera under non-reducing conditions.

38 In immunization assays in mice and hamsters, the purified RBD formulated with  
39 adjuvants based on oil-water emulsifications and squalene was able to stimulate specific  
40 neutralizing antibodies and confirm the secretion of IFN- $\gamma$  after stimulating spleen cells  
41 with the purified RBD. The vaccine candidate was shown to be safe, as demonstrated by  
42 the histopathological analysis in lungs, liver and kidney. These results demonstrate the  
43 potential of the purified RBD administered with adjuvants through an intramuscular  
44 route, to be evaluated in a challenge against SARS-CoV-2 and determine its ability to  
45 confer protection against infection.

46 **Keywords:** RBD, vaccine, SARS-CoV-2, COVID-19, squalene, adjuvant, recombinant  
47 protein, SF9, baculovirus.

48

## 49 **Introduction**

50 In December 2019, a phylogenetically related SARS-CoV virus, later identified as  
51 SARS-CoV-2, caused an outbreak of atypical pneumonia in Wuhan. This virus is  
52 associated with a high rate of transmission, the appearance of symptoms such as fever  
53 and respiratory difficulties leads later to pulmonary and systemic failure with an  
54 exacerbated inflammatory condition that can lead to death [1]. The high transmission  
55 and mortality, coupled with the lack of effective treatment, justify the urgent  
56 development of vaccine candidates.

57 SARS-CoV-2 recognizes the Angiotensin Converting Enzyme-2 (ACE-2), which  
58 belongs to the surface of several types of human cells. The glycosylated Spike (S)  
59 protein gives the virus the ability to bind to the cell membrane and then fuse for the  
60 entry of viral RNA. The Spike protein has the S1 domain, and at its most distal end has  
61 a receptor binding sub-domain (RBD) [2]. The RBD is responsible for the binding of  
62 the virus to the ACE-2 receptor of host cells [3,4]. The amino acid sequences of RBD  
63 protein are being subjected to a positive selective pressure, which is conferring greater  
64 affinity to the ACE-2 receptor, this is due to the change in the structural conformation  
65 of ACE-2 binding [5]. An important mechanism of neutralization is the blockade of  
66 ACE-2 binding to the virus, so candidate vaccines based on the RBD domain induce a  
67 strong immune response, generating a remarkable humoral and cellular response [6–8].

68 Several vaccine candidates use the baculovirus expression system. Researchers widely  
69 use this system due to its easy manipulation and the ability to produce complex proteins  
70 with suitable glycosylation patterns [9]. Currently, human and veterinary vaccines  
71 produced in this system are widely commercialized [10]. Additionally, to the successful  
72 production of some large-scale vaccine candidates for clinical trials [11,12]. However,  
73 these vaccines require appropriate adjuvants to stimulate a strong immune response.

74 There are several types of adjuvants on the market, which have an immunogenic effect  
75 when inoculated in animals and humans: those that are based on Alum [3], as well as  
76 emulsions based on mineral oils or non-mineral [14], which are the most widely used  
77 and approved for use in humans [15]. Alum-based adjuvants are not highly effective in  
78 stimulating the cellular immune response of either Th1 or Th2 [16]. These adjuvants  
79 require improvements in their concentration and the type of aluminum used to generate  
80 a cellular-type immune response; however, these could cause necrosis or tissue damage  
81 in the inoculation area [17]. This has led to the use of emulsions based on squalene-in-  
82 water, which come in formulations according to the interface where they are prepared:  
83 oil-in-water (O/W), which are microdroplets of oil in the aqueous phase together with  
84 the antigen; and water-in-oil (W O), microdroplets of water containing the antigen, in an  
85 oily phase [18].

86 In the present study, purified RBD administered through an intramuscular route with  
87 two different oil adjuvants was evaluated for immunogenicity and safety in mice and  
88 hamsters.

89

## 90 **Material and methods**

### 91 **Animals**

92 This study used thirty-five female albino mice (*Mus musculus*) strain BALB/c of 5-8  
93 weeks-old and 5 female Golden Syrian hamsters (*Mesocricetus auratus*) of 8-10 weeks-  
94 old obtained from the Universidad peruana Cayetano Heredia (UPCH) and the Instituto  
95 Nacional de Salud (INS-Peru), respectively.

### 96 **Adjuvants**

97 An oil-in-water (ESSAI 1849101) hereinafter defined as A1, and modified adjuvant  
98 resulting from a mix of water-in-oil adjuvant and squalene, hereinafter defined as A3  
99 were used.

## 100 **Ethics statement**

101 The use of animals was aligned to ethical protocols approved by the Bioethics  
102 Committee of the Universidad Nacional Hermilio Valdizán and the animal's ethical  
103 Committee at the Universidad Peruana Cayetano Heredia, registered as approval  
104 certificates of Research Project No. 1, 2, and 10 and E011-06-20, respectively.

## 105 **Recombinant RBD expression in Sf9 cells**

### 106 **Recombinant baculovirus generation**

107 The amino acid sequence of the SARS-CoV-2 spike protein was obtained from the  
108 SARS-CoV-2 reference genome Wuhan-Hu-1 (Genbank accession number:  
109 NC\_045512.2). For the design of RBD construct, the Pro330-Ser530 region was  
110 selected. The sequence was optimized for expression in insect cells, the gp67 secretion  
111 signal peptide was added at the N-terminal and a 10xHis-tag in the C-terminal region.  
112 The resulting sequence was chemically synthesized by (GenScript Laboratories, USA)  
113 and cloned at the EcoRI/HindIII sites of pFastBac1 (Thermo Fisher Scientific, USA)  
114 under the control of the polyhedrin promoter and upstream of the SV40 polyadenylation  
115 sequence. Transformation of competent DH10BAC cells and transfection of Sf9 cells  
116 were performed with the Bac-to-Bac technology following the manufacturer's  
117 instructions (Thermo Fisher Scientific, USA).

118

## 119 **Propagation of baculovirus and expression of RBD in Sf9 insect cells**

### 120 **culture**

121 The recombinant baculovirus was amplified in Sf9 cells (Thermo Fisher Scientific,  
122 USA) to a density of  $2 \times 10^6$  cells/mL in ExCell 420 medium (Sigma Aldrich, USA)  
123 supplemented with 5% fetal bovine serum (Gibco, USA). Cultures were infected at a  
124 multiplicity of infection (MOI) of 0.4. At 48 hours post infection (hpi), cultures were  
125 centrifuged at 4500 rpm for 15 minutes. The supernatants were collected and titrated by  
126 plaque assay. Viral stocks were stored at 4°C until use.

127 For protein production, 7 L of Sf9 cell culture at a density of  $2 \times 10^6$  cells/mL were  
128 infected with the baculovirus at a MOI of 3 using a Biostat B plus bioreactor (Sartorius,  
129 Germany). The following conditions were maintained during the culture period:  
130 temperature at 28°C, pH at 6.2, 50% dissolved oxygen (DO) with an oxygen flow rate  
131 of 0.1 vvm via micro sparger and agitation at 150 rpm. At 48 hours post-infection, the  
132 cultures were centrifuged at 4500 rpm for 15 minutes and the supernatant was filtered  
133 through a 0.22 µm membrane.

134

## 135 **Recombinant RBD purification**

### 136 **Tangential filtering**

137 Tangential filtration was conducted on a Hydrosart cassette (Sartorius, Germany) with 5  
138 kDa of nominal molecular weight cutoff (MWCO) was used in a SARTOFLOW  
139 Advanced (Sartorius, Germany) tangential flow system. The supernatant was retained  
140 and concentrated to a volume of 2 L. Subsequently, the retentate was diafiltered into a  
141 saline phosphate buffer (PBS) at pH 6.3 and concentrated again to a volume of 1 L,  
142 filtered as filtered through 0.22 µm membrane and stored at 4°C until use.

143

## 144 **Affinity chromatography**

145 As a first step, an immobilized metal affinity chromatography (IMAC) was performed  
146 using a HisTrap Excel column (1.6 x 2.5 cm) on an AKTA Pure 25L system (Cytiva,  
147 Sweden). Desalting and buffer exchange were performed on a Hiprep 26/10 desalting  
148 column (Cytiva, Sweden) using PBS pH 7.4 throughout the elution phase. The desalted  
149 protein was concentrated on an Amicon 10,000 MWCO (Merck, Germany) and filtered  
150 through a 0.22  $\mu$ M membrane.

151

## 152 **Size exclusion chromatography**

153 As a second step, a size exclusion chromatography was performed on a Superdex 200  
154 increase 10/300 GL column (Cytiva, Sweden) using PBS pH 7.4 during the entire  
155 process. Protein fractions were collected and analyzed by SDS-PAGE under reducing  
156 conditions and Western blot using a commercial anti-His monoclonal antibody. The  
157 pool of selected fractions was concentrated using an Amicon 10,000 MWCO (Merck,  
158 Germany) and filtered through a 0.22  $\mu$ M membrane. The concentration of purified RBD  
159 was determined using the Bradford assay (Merck, Germany).

160

## 161 **Recombinant RBD characterization in vitro**

### 162 **RBD binding to human ACE-2**

163 A 96-well plate was coated overnight at 4°C with 100  $\mu$ L of a recombinant human  
164 ACE-2 fused to a Fc fragment (GenScript Laboratories, USA) at 1  $\mu$ g/mL in carbonate  
165 buffer (pH 9.6). The plate was blocked with 3% skimmed milk for 1 hour at room  
166 temperature and then washed five times with PBS 0.05% Tween 20 (PBS-T). Serial

167 dilutions (1:2) of purified RBD were performed in PBS, starting from 2 µg/mL and  
168 ending to 1.9 ng/mL. Dilutions were added to the wells and incubated for 2 hours at  
169 37°C. Five washing steps with PBS-T were performed, 100 µL of rabbit IgG polyclonal  
170 anti-spike antibody (SinoBiological, China) was added to the wells (1:5000) in 1%  
171 skimmed milk and incubated for 1 hour at 37°C. The plate was washed five times with  
172 PBS-T. Then, 100 µL of anti-rabbit IgG HRP conjugated (GenScript, USA) (1:30,000)  
173 in 1% skimmed milk was added to the wells. The plates were incubated at 37°C for 1  
174 hour. Finally, the plates were washed with PBS-T five times, and 100 µL of TMB  
175 (Sigma Aldrich, USA) were added to the wells and incubated for 15 minutes at room  
176 temperature. The reaction was stopped with 50 µL of 2N sulfuric acid and the  
177 absorbance at 450 nm was read with an Epoch 2 microplate reader (Biotek, USA).

178

### 179 **RBD binding to Vero-E6 cells**

180 Vero-E6 cells (Cod. CRL-1586™, ATCC®, USA), which were previously cultured in  
181 DMEM/F12 (HyClone, USA) + 10% fetal bovine serum (FBS) (HyClone, USA), were  
182 harvested and washed with DPBS with 5% FBS (FACS buffer). Approximately 10<sup>6</sup>  
183 cells were blocked with FACS buffer and 5% of normal mouse serum (Abcam, USA)  
184 for 30 min at 37°C. Then, the cells were incubated with the purified RBD (8 µg/mL) for  
185 2 h at 37°C. To remove the excess of RBD not attached to Vero E6, the cells were  
186 washed with FACS buffer twice. After that, the mix was marked with rabbit monoclonal  
187 antibody anti-SARS-CoV-2 S1 (1:200) (Sino Biological, China) as the primary antibody  
188 for 1 h at 37°C, followed by the addition of the secondary goat anti-rabbit IgG antibody  
189 conjugated with Alexa Fluor 488 (1:200) (Abcam, USA). Finally, cells were acquired  
190 by the BD FACSCanto™ II flow cytometer (BD Biosciences, USA). The data was  
191 analyzed using the software FlowJo v.10.6 (BD Biosciences, USA), and the graphics



192 were generated with GraphPad Prism 8.0.1. For the interpretation of results, the  
193 percentage of positive cells indicates of binding of RBD to Vero E6 cells.

194

### 195 **RBD recognition by immunized sera**

196 Purified RBD was loaded at 0.2  $\mu\text{g}/\text{well}$  and electrophoretically separated by SDS-  
197 PAGE under non-reducing conditions and transferred to nitrocellulose membranes using  
198 an e-blot device (GenScript Laboratories, USA). The membranes were blocked with 5%  
199 (w/v) non-fat milk in PBS with 0.1% of Tween 20 at pH 7.4 and incubated overnight at  
200 room temperature. Then, membranes were washed three times for 5 minutes each with  
201 Tris-buffered saline containing 0.1% (v/v) Tween 20 (TBS-T) and incubated for two  
202 hours at room temperature with serum of a hamster immunized with a New Castle  
203 disease virus expressing the S1 sub-unit of SARS-CoV-2 [19] (1:250) in 5% non-fat  
204 milk. After three washes with TBS-T, anti-Hamster IgG antibody conjugated to HRP  
205 (Abcam, USA) was added to the membrane at 1:5000 dilution in 5% non-fat milk and  
206 incubated for two hours at room temperature. Finally, the membranes were washed  
207 three times with TBST-0.1%, incubated with luminol (Azure Biosystems, USA) as a  
208 substrate and revealed with a CCD camera (Azure Biosystems, USA).

209

### 210 **Immunization and samples collection in mice**

211 Female BALB/c mice (18-25g) were immunized intramuscularly (i.m.) with 20 and 50  
212  $\mu\text{g}/\text{mice}$  of purified RBD mixed with 50  $\mu\text{L}$  of A1 or A3 (1:1, 100  $\mu\text{L}$  final volume).  
213 Two boosters were administered at 15 and 30 days post-immunization (DPI) with the  
214 same dose (Fig. 1). As a control, mice were immunized with PBS mixed with A1 or A3,  
215 an unvaccinated group was maintained during the experiment. Serum of each animal

216 was collected on 0, 15, 30 and 45 DPI by low-speed centrifugation of blood at 2500 rpm  
217 for 5 minutes. All animals were euthanized at 45 DPI and organs (lung, liver and  
218 kidney) were collected for histopathological analysis.

219 Figure 1. Mice immunization flow chart. Mice were immunized by the intramuscular  
220 route using a prime-boost regimen with a booster on days 15 and 30. Seven groups of  
221 mice were included: group 1 (20 µg RBD/A1, n=5), group 2 (50 µg RBD/A1, n=5),  
222 group 3 (20 µg RBD/A3, n=5), group 4 (50 µg RBD/A3, n=5), group 5 (only A1 n=5),  
223 group 6 (only A3 n=5) and group 7 (no immunization).

## 224 **Immunization and samples collection in hamsters**

225 Five Golden Syrian hamsters were immunized intramuscularly, each one with 30 µg of  
226 purified RBD mixed with oil adjuvant A3 (1:1) (which had the best adjuvant tested in  
227 mice) in a final volume 100 µL (Fig 2). Five animals received only adjuvant A3 and  
228 were considered as the group. At 15 DPI, all groups received a booster at the same dose.  
229 Hamsters were bled at 0, 15 and 30 DPI to evaluate the specific and neutralizing  
230 antibody (nAbs) titers. Serum from each sample was obtained by centrifugation of  
231 blood at 2500 rpm for 5 minutes.

232 Figure 2. Hamster immunization flow chart. Hamsters were immunized by the  
233 intramuscular route with 30 µg of purified RBD in adjuvant A3 using a prime-boost  
234 regimen with a booster on day 15.

## 235 **Evaluation of humoral immunity**

### 236 **Detection of specific antibodies by ELISA**

237 Nunc MaxiSorp 96-well flat bottom plates (Sigma-Aldrich, USA) were coated with 100  
238 µL of SARS-CoV-2 RBD (1 µg/mL) (GenScript, USA) in carbonate bicarbonate buffer

239 (pH 9.6) and incubated at 4°C overnight. The next day, the wells were washed six times  
240 with PBS containing 0.05% (v/v) Tween-20 (PBS-T) and blocked with 3% (w/v) Difco  
241 Skim Milk (BD Biosciences, USA) in PBS-T for 2 h in agitation at RT. The plates were  
242 then washed six times with PBS-T. Then, 100 µL of each collected serum sample  
243 diluted 1:100 with 1% (w/v) Difco Skim Milk (BD Biosciences, USA) was added to  
244 each plate for 1 h at 37°C. The wells were washed six times with PBS-T and incubated  
245 with 100 µL (1:10000) of Goat Anti Mouse IgG (Genscript, USA) or Anti Hamster IgG  
246 (Abcam, USA) conjugated to HRP diluted in 1% Difco Skim Milk in PBS-T for 1h at  
247 37°C. The plates were washed six times and were incubated with 100 µL of TMB for 15  
248 min at RT. Finally, the reaction was stopped by adding 50 µL per well of 2 N H<sub>2</sub>SO<sub>4</sub>,  
249 and the plates were read at 450 nm using an Epoch 2 microplate reader (Biotek, USA).  
250 The negative control was obtained from serum samples of the control group.

## 251 **Detection of neutralizing antibodies**

252 Hamster serum samples were processed to assess neutralizing antibodies (nAbs) titers  
253 against SARS-CoV-2 at 0, 15, and 30 days post immunization. All Neutralization assays  
254 were performed with the surrogate virus neutralization test (sVNT) (GenScript, USA),  
255 following the manufacturer's instructions. Plates were read for absorbance at 450 nm  
256 using an Epoch 2 microplate reader (Biotek, USA). The optical density results were  
257 converted into percentage of inhibition, by the formula provided by the manufacturer.  
258 The positive and negative cut-off points for the detection of SARS-CoV-2 nAbs were  
259 set as follows: positive, if percentage of inhibition  $\geq 30\%$  (neutralizing antibody  
260 detected) and negative, if percentage of inhibition  $<30\%$  (neutralizing antibody not  
261 detectable).

262

## 263 **Evaluation of cellular immunity**

### 264 **Extraction of mononuclear cells from mouse spleen**

265 The mice vaccinated with the purified RBD and the control group (adjuvant only) were  
266 euthanized at 45 days post immunization, and spleens were removed. aseptically. The  
267 organs were transferred to Petri dishes with 5 mL cold RPMI medium (Sigma Aldrich,  
268 USA) and two pieces of 41  $\mu\text{m}$  nylon net (Merck, USA), where the organ was disrupted  
269 using a 3 mL syringe plunger. The cell suspension was filtered and placed in a  
270 centrifuge tube containing 2 mL of Histopaque® 1077 (Sigma Aldrich, USA). The  
271 samples were centrifuged at 300 x g for 30 minutes without brake. The buffy coat  
272 containing mononuclear cells was removed, placed in cold RPMI medium, and washed  
273 twice. Cells were resuspended in 1 mL of complete RPMI medium and counted by  
274 hemocytometer. Cells were resuspended in fetal bovine serum (HyClone, USA) with  
275 10% dimethyl sulfoxide (Sigma Aldrich, USA) and frozen in liquid nitrogen until use.

### 276 **ELISPOT for IFN- $\gamma$ secretion in spleen mononuclear cells.**

277 Mononuclear cells were cultured in 96-well plates with a PVDF membrane, previously  
278 coated with anti-mouse IFN- $\gamma$  (clone RMMG-1, Merck, USA) and blocked with 1%  
279 bovine serum albumin (BSA) (Sigma Aldrich, USA). Cells were stimulated with the  
280 purified RBD (4  $\mu\text{g}/\text{mL}$ ) for 24 hours at 37°C at 5%  $\text{CO}_2$ . Concanavalin A (Sigma  
281 Aldrich, USA) was used as a positive control. The cells were removed by successive  
282 washes with water and PBS with 0.1% Tween. The wells were incubated with  
283 biotinylated anti-mouse IFN- $\gamma$  (clone R4-6A2, Biolegend, USA) for 16 hours at 4° C.  
284 After washing, the wells were incubated with streptavidin-alkaline phosphatase (SAP)  
285 (Sigma Aldrich, USA) for one hour at room temperature. After washing, the  
286 chromogen-substrate, NBT/BCIP (Abcam, USA), was added. The spots formed were

287 counted with an AID EliSpot plate reader (Advanced Imaging Devices, v. 7.0,  
288 Germany).

### 289 **Intracellular labeling of cellular immune response cytokines.**

290 The mononuclear cells were stimulated with or without purified RBD (8 µg/mL) for 21  
291 hours at 37° C at 5% CO<sub>2</sub> hours, in the last 5 hours of culture a protein transport  
292 inhibitor Brefeldin A (1µL/mL) was added (BD Biosciences, USA). Cells were fixed  
293 using the BD Cytotfix/Cytoperm® kit (BD Biosciences, USA) following the  
294 manufacturer's instructions, and then labeled with conjugated antibodies to surface  
295 antigens (PerCP-Cy®5.5 anti-mouse CD3, FITC anti-mouse CD4, APC-Cy®7 mouse  
296 anti-CD8, all from BD Biosciences, USA; LIVE/DEAD™ Fixable Yellow Dead Cell  
297 Stain, Invitrogen, USA) and intracellular cytokines (PE anti-mouse IFN-γ, PE-Cy®7  
298 anti-mouse TNF-α, APC anti-mouse IL-2, all from BD Biosciences, USA). The labeled  
299 cells were acquired with the BD FACSCanto™ II flow cytometer and analyzed with the  
300 program FlowJo v.10.6.2 (BD Biosciences).

### 301 **Immunophenotype of spleen mononuclear cells.**

302 Mononuclear cells were directly labeled with conjugated antibodies to surface antigens  
303 (PerCP-Cy®5.5 anti-mouse CD3, clone, FITC anti-mouse CD4, APC-Cy®7 anti-mouse  
304 CD8, for T lymphocyte phenotype, all from BD Biosciences, USA; LIVE/DEAD™  
305 Fixable Yellow Dead Cell Stain, for cell viability, cat. No. L34959, invitrogen, USA).  
306 These cells were acquired with the BD FACSCanto™ II flow cytometer, and the  
307 analysis was performed with the program FlowJo v 10.6.2 (BD Biosciences).

308

### 309 **Histopathological analysis**

310 For safety analysis, organs were obtained from euthanized mice at 45 days post  
311 immunization and fixed with 10% buffered formalin for 48 hours. Then, organs were  
312 reduced and placed in a container for 24 hours with buffered formalin. The containers  
313 with the organs were passed to an automatic tissue processor (Microm brand)  
314 conducting the following processes: dehydration, diaphanating, rinsing, and  
315 impregnation; within an average of 8 hours. Organs included in paraffin were sectioned  
316 to a thickness of 5 microns (Microtome Leica RM2245) and placed in a flotation  
317 solution in a water bath and then fixed on a slide sheet, dried in the stove at 37°C for 1  
318 to 2 hours. The staining was done with the Hematoxylin and Eosin staining method  
319 (H&E). Samples were mounted in a microscope slide with Canada Balm (glue) and  
320 dried at 37°C for 12 to 24 hours, for further labeling. The colored slides with H&E  
321 were taken and analyzed under an AxioCam MRc5 camera and AxioScope.A1  
322 microscope (Carl Zeiss, Germany) at 20x magnification by a board-certified veterinary  
323 pathologist.

## 324 **Statistical analysis**

325 All quantitative data were analyzed using GraphPad Prism version 6.1 (GraphPad  
326 Software, San Diego, CA, USA). Student t-test was used to evaluate cellular immunity.  
327 For EC50 estimation, a regression model of four parameter logistic curve (4PL) was  
328 used. Two-way ANOVA analysis was performed to determine significant difference in  
329 ELISA results. A 5% statistical significance was considered in all cases.

330

331

## 332 **Results**

### 333 **Recombinant SARS-CoV-2 RBD production**

334 Recombinant RBD was expressed and secreted into the extracellular medium by  
335 infected Sf-9 cells. A single band of ~28KDa was detected by western blot using Anti-  
336 his and Anti-spike antibodies (Fig 3B). In bioreactor conditions, the highest protein  
337 expression level was observed at 68 hours post-infection. After the purification  
338 processes, a productivity level of 0.8 mg/mL of RBD was obtained at a purity level >  
339 90% (Fig 3C).

340 Figure 3. RBD expression and purification. (A) Design of the expression cassette  
341 integrated into the recombinant baculovirus. (B) Detection of RBD from infected  
342 culture supernatants using an anti-His (left) and anti-spike (right) antibody. Bv-WT:  
343 Wild type baculovirus; Bv-RBD: RBD expressing baculovirus. (C) SDS-PAGE of  
344 purified RBD after the affinity chromatography purification step (Lane 1) and size  
345 exclusion chromatography (Lane 2).

346

### 347 **Recombinant SARS-CoV-2 RBD characterization**

348 To determine the correct conformational state of RBD, ACE-2 receptor binding assays  
349 were performed. ACE-2 binding dependent on RBD concentration was observed, with a  
350 half maximal effective concentration (EC50) of 46.8 ng/mL (Fig 4A). Similarly,  
351 through flow cytometry, bounded RBD to Vero E6 cell surface at different  
352 concentrations, with a 60% binding level (Fig 4C). Based on the main fluorescence  
353 intensity (MFI), the difference between the cells treated with purified RBD and those  
354 treated with FACS buffer as a negative control was significant. On the other hand,  
355 commercially available recombinant RBD was used as a positive control. Although its

356 binding was slightly higher than RBD (78%), the difference was not statistically  
357 significant. This trend was observed in all the concentrations evaluated.

358 The importance of disulfide bonds for the correct folding of the RBD sub-domain is  
359 known. Therefore, an additional way to verify the correct folding of the recombinant  
360 RBD was evaluating its detection under reducing and non-reducing conditions using a  
361 serum from a hamster immunized with a New Castle Disease virus (NDV) expressing  
362 the S1 Domain [19] (Fig 4B). In this way, by Western blot RBD could be detected by  
363 the serum only under non-reducing conditions, demonstrating that it conserves the  
364 folding of the RBD sub-domain occurring in the Spike protein.

365 Figure 4. RBD binding and folding characterization in vitro. (A) Dose dependent curve  
366 of RBD binding to human ACE-2 by ELISA, dashed lines represent the EC50 value.  
367 Dots and error bars represent the mean value of three independent experiments and the  
368 standard deviation, respectively. (B) Disulfide bond dependent recognition of RBD by  
369 hamsters immunized serum by western blot. Lane1: RBD under non-reducing  
370 conditions; Lane 2: RBD under reducing conditions. (C) RBD binding to Vero E6 cell  
371 surface. The binding values are represented as the percentage of cells bound to RBD  
372 (left diagram) and the Mean Fluorescence Intensity (MFI) of each group was evaluated  
373 (right diagram). Two repetitions were performed per group, except in the FACS buffer  
374 group. Student *t*-test was used to compare the MFI values. ns: not significant ( $P>0.05$ );  
375 \*\*: significant ( $P<0.01$ ).

376

## 377 **Humoral Immunity**

378 Specific antibodies were detected in both groups immunized with each adjuvant. In  
379 group A1, antibody levels with both doses of FAR-RBD were similar at 15 and 30 days



380 after immunization. However, after the second booster, there was a slight decrease in  
381 the antibodies detected in the sub-group immunized with 20  $\mu$ g of RBD, while those  
382 immunized with 50  $\mu$ g increased slightly. Regarding group A3, it was observed that the  
383 antibodies generated were higher in the dose of 50  $\mu$ g at all times of evaluation.  
384 Moreover, at 45-day post-immunization the antibodies detected remained at the same  
385 level prior to the second booster. In addition, group A3 generated higher levels of  
386 antibodies at 15 days post-immunization compared to group A1. Control groups  
387 immunized with each adjuvant had baseline reactivities throughout the evaluation time  
388 (Fig 5).

389 Figure 5. Detection of specific antibodies against RBD in mice. Immunized mice were  
390 bled at 0, 15, 30 and 45 days post immunization. All sera were isolated by low-speed  
391 centrifugation. Serum samples were processed to detect specific antibodies against  
392 SARS-CoV-2 RBD protein using indirect ELISA assay. (A) Group immunized with  
393 RBD mixed with adjuvant 1 and (B) Group immunized with RBD mixed with adjuvant  
394 3. Two-way ANOVA and post-hoc Tukey's test were performed. \*\*:  $P < 0.01$

395 Since with adjuvant 3 the maximum levels of antibodies were obtained with a single  
396 boost and in less time, this adjuvant was used to immunize the hamsters. In this way, a  
397 significant increase in specific antibody levels was observed from day 15 post-  
398 immunization until day 30 in all the individuals tested (Fig 6A). The neutralization  
399 assays using the surrogate virus neutralization test (sVNT) detected neutralizing  
400 antibodies only at day 30 post-immunization, where the sera from hamsters vaccinated  
401 showed a mean percentage of inhibition of the RBD-ACE2 union above 30%. Sera of  
402 the control group remained below 30% and did not show neutralizing antibodies (Fig  
403 6B).

404 Figure 6. Detection of specific antibodies against RBD and neutralizing antibodies in  
405 hamsters. (A) Immunized hamsters were bled at 0, 15 and 30 days post immunization.  
406 Serum samples were processed to detect specific antibodies against SARS-CoV-2 RBD  
407 protein using indirect ELISA assay. (B) Serum samples were processed to evaluate the  
408 neutralizing antibody titers against SARS-CoV-2 using sVNT. The cut-off for  
409 positive/negative neutralizing antibodies in the sample was 30% of inhibition of RBD  
410 binding to ACE-2. Two-way ANOVA and post-hoc Tukey's test were performed. \*\*:  $P < 0.01$ .  
411 \*\*\*\*:  $P < 0.0001$ .

412

### 413 **Cellular immunity**

414 The cellular immunity stimulated by the purified RBD in mice was evaluated on day 45  
415 after the first immunization. The percentage of CD4<sup>+</sup> and CD8<sup>+</sup> T cells is observed for  
416 each adjuvant evaluated. For adjuvant A1, the percentage of CD4<sup>+</sup> and CD8<sup>+</sup> T cells  
417 increased proportional to the dose of RBD administered (Fig 7A). For adjuvant A3, the  
418 percentage of cells decreased when the dose of RBD was increased. Although the  
419 differences were not significant for all groups compared with the control group. When  
420 reviewing the production of Th1-type cytokines (IFN- $\gamma$ , TNF- $\alpha$  and IL-2) (Fig 7C), the  
421 increase in CD8<sup>+</sup> T cells secreting IFN- $\gamma$  (for A1 and A3), TNF- $\alpha$  (for A1 and A3) and  
422 IL-2 (for A1 and A3) decreased according to the administered dose of RBD. Regarding  
423 the secretion of IFN- $\gamma$  in splenocytes stimulated with purified RBD using the ELISPOT  
424 technique (Fig 7B), the adjuvant A3 stimulated a greater number of cells directly  
425 proportional to the administered dose.

426 Figure 7. Evaluation of cellular immunity in mice vaccinated with purified RBD. Mice  
427 were immunized with 20 and 50  $\mu\text{g}$  of RBD using two different adjuvants (A1 and A3)

428 at 0, 15 and 30 days post immunization. On day 45 post-immunization mice were  
429 sacrificed and spleens were processed. (A) Percentage of CD4 and CD8 positive cells  
430 by flow cytometry, between the groups immunized (n=3, except the adjuvant control).  
431 (B) IFN- $\gamma$  ELISPOT of splenocytes between the groups immunized with purified RBD  
432 using A1 or A3 adjuvant (n=3, except the adjuvant control). (C) Intracellular staining of  
433 Th1 cytokines (IFN- $\gamma$ , TNF- $\alpha$  and IL-2) of splenocytes stimulated with RBD (n=3,  
434 except the adjuvant control). ns: not significant ( $P>0.05$ ), \*:  $P<0.05$ .

435

## 436 **Safety**

437 Histopathological analysis of the of the groups of mice immunized with purified RBD  
438 mixed or mixed with A1 or A3, including the unvaccinated group not showed signs of  
439 serious injury or damage. Lungs not showed clinical appearance of pneumonia and there  
440 was no evidence of kidney symptoms. Although in liver a slight vacuolar degeneration  
441 was identified, this was observed in all the groups tested, including the control group.  
442 (Fig. 8).

443

444 Figure 8. Histopathological analysis of mice inoculated with purified RBD and control.  
445 Organs were obtained 45 days after the first immunization and stained with  
446 hematoxylin-eosin (H&E). These images are representative slides from vaccinated mice  
447 and negative control mice. (A) Lung sections. (B) Liver sections. (C) Kidney sections.  
448 All the images are in a 200X magnification.

449

## 450 **Discussion**

451 SARS-CoV-2 continues to be a problem worldwide. As an immediate response to the  
452 emergence of new variants and their dissemination, the constant development and  
453 evaluation of vaccines are necessary. In the present study, production of a recombinant  
454 sub-domain RBD expressed in insect cells, and immunization together with two oil-  
455 based adjuvants, elicited an immune response in mice and hamsters while demonstrated  
456 to be safe.

457 Currently, most of the approved and candidate vaccines are based on the complete spike  
458 protein. However, there are several vaccine candidates based on the single RBD  
459 antigen, ongoing pre-clinical and clinical phase [20]. Although, in some reports the  
460 complete spike has shown greater immunogenicity [21], the single RBD remains as a  
461 strong vaccine candidate because it comprises the most important epitopes to which  
462 neutralizing antibodies should target. In addition, it generates antibodies with enhanced  
463 neutralizing activity [22–24]. The greater accumulation of mutations in the S1 and S2  
464 domains can destabilize the protein, hindering its production and the yields obtained as  
465 a purified protein [25,26]. On the other hand, RBD has demonstrated an easier  
466 production [27], and results in a more conserved antigen. Recent studies have  
467 bioengineered RBD variants with improved stability and higher immune response in  
468 mice compared to the current Wuhan-Hu-1 vaccine [28]. Likewise, a thermotolerant  
469 RBD fused to a trimerization motif has generated high neutralization titers in guinea  
470 pigs and mice, as well as protection in hamsters from viral challenge [29].

471 Despite that the purified RBD evaluated in this study comprised 22 amino acids less  
472 than the generally recognized RBD region (Arg319-Phe541) [30], it was structurally  
473 and functionally viable as demonstrated by the binding assays by ELISA and flow

474 cytometry. This functionality was maintained because the expressed region comprises  
475 the residues that form the disulfide bonds that give stability to the nucleus and the key  
476 external sub-domains of the RBD [3,23] maintaining the integrity of the receptor  
477 binding motif, which ultimately is the main region that directly interacts with the ACE2  
478 receptor. This was confirmed by the lack of RBD recognition of the hamster anti-S1  
479 immune sera under reducing conditions, but the strong recognition of RBD by the  
480 immune sera under non-reducing conditions. This suggests, that the disulphide bonds  
481 are present and are favoring a correct folding and 3D structure of the RBD antigen, that  
482 may be presenting appropriate conformational epitopes, as most of the immune  
483 antibodies targets tertiary epitopes spanning the exposed sites of the RBD in the trimeric  
484 pre-fusion Spike [31].

485 The production level of RBD in this study, was relatively low (0.8 mg/L), compared to  
486 previous reports of expression of the same domain using the baculovirus expression  
487 system [27], it is likely that this is due to the baculovirus type used, which is not  
488 optimized for secreted expression, or to the second purification step required to obtain a  
489 higher degree of purity. These levels could be optimized using baculoviruses lacking the  
490 *v-cath* and *chiA* genes [32] or through optimization strategies of the amino acid  
491 sequence that have been proven to improve expression levels and immunogenicity of  
492 the RBD [28,33].

493 The chemical composition of an adjuvant is important because its components may  
494 interfere with organism responses. Most oil-water (O/W) adjuvants that contain  
495 squalene, also have other components (Tween 80, Span 85, polyethylene glycol or  
496 derivatives), which when emulsified in an aqueous phase, generate a stable chemical  
497 structure that allows the transport of antigens for their recognition by cells such as  
498 macrophages or dendritic cells [18,34]. In the immunization experiments conducted in

499 this study, adjuvant 3 (W/O + squalene) was associated to higher levels of anti-RBD  
500 antibodies than adjuvant 1 (O/W) at 15 days post immunization. However, after the  
501 second booster was administered (45 DPI), the antibody levels for both adjuvants were  
502 not significantly different. This could be explained by the fact that O/W emulsions, as  
503 an adjuvant for mice, generates higher levels of antibodies while directing the cellular  
504 immune response to the Th2 type [34]. Also, it is known that O/W emulsions stimulate  
505 a strong production of TNF- $\alpha$  [16,35] and do not generate local inflammation reactions  
506 when injected subcutaneously or intramuscularly [36]. On the other hand, the W/O  
507 adjuvant formulations are not effective enough to induce strong humoral responses, as  
508 they can generate inflammatory responses and the formation of granulomas [36,37]. In  
509 contrast, adjuvant A3, which is a novel composition, demonstrates the stimulation of a  
510 strong humoral response. We believe further studies are necessary to clarify and  
511 confirm these observations

512 When adjuvant A1 was administered with the purified RBD, the formulation did not  
513 generate IFN- $\gamma$ , IL-2 nor TNF- $\alpha$  in the evaluation by ICS. However, an increase in the  
514 percentage of CD4+ and CD8+ T cells was observed. This observation is in agreement  
515 with a previous study, where Arunachalam et al. [38] found that adjuvant A1 (Essai  
516 O/W 1849101, Seppic) added to RBD nanoparticles did not elicit a strong antibody  
517 response nor protection as expected in Rhesus monkeys. Nevertheless, when A1 was  
518 used with alpha-tocopherol it produced a stronger level of neutralizing antibodies and  
519 protection against infection with SARS-CoV-2. However, the use of this adjuvant  
520 generated an inflammatory response, associated with a high expression of TNF- $\alpha$  and  
521 IL-2. We found that the novel adjuvant A3 stimulated the secretion of greater IFN- $\gamma$   
522 levels in splenocytes compared to adjuvant A1, as well as IL-2 and TNF- $\alpha$  in CD8+ T

523 cells. This is consistent with the possible inflammatory effect generated by adjuvants  
524 based on W/O emulsions [37].

525 The generation of neutralizing antibodies in hamsters was observed at 30 days post  
526 immunization. Although the surrogate test does not directly determine the neutralization  
527 of virus invasiveness in cells, it has been shown that it has a high correlation index with  
528 classic viral neutralization tests [8]. In addition, various studies have demonstrated a  
529 relationship between the development of neutralizing antibodies with the protection of  
530 re-infection in humans, as well as in challenge tests in hamsters [39,40].

531 Due to limitations in space and the availability of animals, this trial was conducted with  
532 5 individuals per group, and the heterogeneity was evident as previously reported in a  
533 similar protocol [41]. Unfortunately, it was not possible to establish clear conclusions  
534 about the tendency of the population when stimulated with the two different adjuvants,  
535 as there was no significant difference between the controls and the immunized groups. It  
536 is important to perform additional studies with a greater sample size to perform a better  
537 evaluation of cellular and humoral immunity [13,16,23,28] to 8 per group [35,42].

538 In conclusion, the RBD vaccine candidate presented in this study, administered through  
539 an intramuscular route, was shown to be safe and able to induce humoral and cellular  
540 immunity as well as neutralizing antibodies in mice and hamsters. Further studies are  
541 required to evaluate protection in a challenge trial.

542

#### 543 **Ethics statement**

544 This study was approved by the Bioethics Committee of the Universidad Nacional  
545 Hermilio Valdizán registered as approval certificates of Research Project No. 1, 2 and

546 10. Animal immunizations and procedures were performed by qualified personnel  
547 following the ARRIVE guidelines [43]

548

#### 549 **Authors' contributions**

550 MFD, MZ, RCG, APA contributed to conception and designed the research. RCG,  
551 APA, RM, KGM, AM, DRM, SQG, MCM, AAA, IRO, MCO, EHG, YRL, NPM, GIR,  
552 YSA, DVP, KVS performed experiments. RCG, RMM, APA and DRM acquired the  
553 data of the study. RCG, APA and DRM analyzed and interpreted the data. RCG, RMM,  
554 APA, DRM and SQG wrote the paper, and all authors revised it, read and approved the  
555 final manuscript.

556

## 557 **References**

- 558 1. Zhou P, Yang X-L, Wang X-G, Hu B, Zhang L, Zhang W, et al. A pneumonia  
559 outbreak associated with a new coronavirus of probable bat origin. *Nature*.  
560 2020;579: 270–273. doi:10.1038/s41586-020-2012-7
- 561 2. Walls AC, Park Y-J, Tortorici MA, Wall A, McGuire AT, Velesler D. Structure,  
562 Function, and Antigenicity of the SARS-CoV-2 Spike Glycoprotein. *Cell*. 2020;  
563 1–12. doi:10.1016/j.cell.2020.02.058
- 564 3. Lan J, Ge J, Yu J, Shan S, Zhou H, Fan S, et al. Structure of the SARS-CoV-2  
565 spike receptor-binding domain bound to the ACE2 receptor. *Nat* 2020;581: 215–  
566 220. doi:10.1038/s41586-020-2180-5
- 567 4. Tai W, He L, Zhang X, Pu J, Voronin D, Jiang S, et al. Characterization of the  
568 receptor-binding domain (RBD) of 2019 novel coronavirus: implication for



- 569 development of RBD protein as a viral attachment inhibitor and vaccine. *Cell*  
570 *Mol Immunol* 2020 176. 2020;17: 613–620. doi:10.1038/s41423-020-0400-4
- 571 5. Ou J, Zhou Z, Dai R, Zhang J, Zhao S, Wu X, et al. V367F Mutation in SARS-  
572 CoV-2 Spike RBD Emerging during the Early Transmission Phase Enhances  
573 Viral Infectivity through Increased Human ACE2 Receptor Binding Affinity. *J*  
574 *Virol.* 2021;95. doi:10.1128/JVI.00617-21
- 575 6. Premkumar L, Segovia-Chumbez B, Jadi R, Martinez DR, Raut R, Markmann  
576 AJ, et al. The receptor-binding domain of the viral spike protein is an  
577 immunodominant and highly specific target of antibodies in SARS-CoV-2  
578 patients. *Sci Immunol.* 2020;5. doi:10.1126/sciimmunol.abc8413
- 579 7. Min L, Sun Q. Antibodies and Vaccines Target RBD of SARS-CoV-2. *Front Mol*  
580 *Biosci.* 2021;8. doi:10.3389/fmolb.2021.671633
- 581 8. Tan CW, Chia WN, Qin X, Liu P, Chen MIC, Tiu C, et al. A SARS-CoV-2  
582 surrogate virus neutralization test based on antibody-mediated blockage of  
583 ACE2–spike protein–protein interaction. *Nat Biotechnol* 2020;38: 1073–1078.  
584 doi:10.1038/s41587-020-0631-z
- 585 9. Cox MMJ. Recombinant protein vaccines produced in insect cells. *Vaccine.*  
586 2012;30: 1759–1766. doi:10.1016/j.vaccine.2012.01.016
- 587 10. Felberbaum RS. The baculovirus expression vector system: A commercial  
588 manufacturing platform for viral vaccines and gene therapy vectors. *Biotechnol J.*  
589 2015;10: 702–714. doi:10.1002/biot.201400438
- 590 11. Lai C-C, Cheng Y-C, Chen P-W, Lin T-H, Tzeng T-T, Lu C-C, et al. Process  
591 development for pandemic influenza VLP vaccine production using a baculovirus

- 592 expression system. *J Biol Eng.* 2019;13: 78. doi:10.1186/s13036-019-0206-z
- 593 12. Lee S-M, Hickey JM, Miura K, Joshi SB, Volkin DB, King CR, et al. A C-  
594 terminal Pfs48/45 malaria transmission-blocking vaccine candidate produced in  
595 the baculovirus expression system. *Sci Rep.* 2020;10: 395. doi:10.1038/s41598-  
596 019-57384-w
- 597 13. Shrivastava T, Singh B, Rizvi ZA, Verma R, Goswami S, Vishwakarma P, et al.  
598 Comparative Immunomodulatory Evaluation of the Receptor Binding Domain of  
599 the SARS-CoV-2 Spike Protein; a Potential Vaccine Candidate Which Imparts  
600 Potent Humoral and Th1 Type Immune Response in a Mouse Model. *Front*  
601 *Immunol.* 2021;12. doi:10.3389/fimmu.2021.641447
- 602 14. Shah RR, Brito LA, O'Hagan DT, Amiji MM. Emulsions as Vaccine Adjuvants.  
603 In: Foged C, Rades T, Perrie Y, Hook S, editors. *Subunit Vaccine Delivery*  
604 *Advances in Delivery Science and Technology.* New York: Springer; 2015. pp.  
605 59–76. doi:10.1007/978-1-4939-1417-3\_4
- 606 15. Shardlow E, Mold M, Exley C. Unraveling the enigma: elucidating the  
607 relationship between the physicochemical properties of aluminium-based  
608 adjuvants and their immunological mechanisms of action. *Allergy, Asthma Clin*  
609 *Immunol.* 2018;14: 80. doi:10.1186/s13223-018-0305-2
- 610 16. Yam KK, Gupta J, Allen EK, Burt KR, Beaulieu É, Mallett CP, et al.  
611 Comparison of AS03 and Alum on immune responses elicited by A/H3N2 split  
612 influenza vaccine in young, mature and aged BALB/c mice. *Vaccine.* 2016;34:  
613 1444–1451. doi:10.1016/j.vaccine.2016.02.012
- 614 17. Nies I, Hidalgo K, Bondy SC, Campbell A. Distinctive cellular response to  
615 aluminum based adjuvants. *Environ Toxicol Pharmacol.* 2020;78: 103404.

- 616           doi:10.1016/j.etap.2020.103404
- 617   18.   Burakova Y, Madera R, McVey S, Schlup JR, Shi J. Adjuvants for Animal  
618       Vaccines. *Viral Immunol.* 2018;31: 11–22. doi:10.1089/vim.2017.0049
- 619   19.   Fernandez-Diaz M, Calderón K, Rojas-Neyra A, Vakharia VN, Choque Guevara  
620       R, Montalvan A, et al. Development and pre-clinical evaluation of Newcastle  
621       disease virus-vectored SARS-CoV-2 intranasal vaccine candidate. *bioRxiv*  
622       [Preprint]. 2021 [cited 2021 November 13]. doi:10.1101/2021.03.07.434276
- 623   20.   Martínez-Flores D, Zepeda-Cervantes J, Cruz-Reséndiz A, Aguirre-Sampieri S,  
624       Sampieri A, Vaca L. SARS-CoV-2 Vaccines Based on the Spike Glycoprotein  
625       and Implications of New Viral Variants. *Front Immunol.* 2021;12.  
626       doi:10.3389/fimmu.2021.701501
- 627   21.   Li M, Guo J, Lu S, Zhou R, Shi H, Shi X, et al. Single-Dose Immunization With  
628       a Chimpanzee Adenovirus-Based Vaccine Induces Sustained and Protective  
629       Immunity Against SARS-CoV-2 Infection. *Front Immunol.* 2021;12.  
630       doi:10.3389/fimmu.2021.697074
- 631   22.   Yang S, Li Y, Dai L, Wang J, He P, Li C, et al. Safety and immunogenicity of a  
632       recombinant tandem-repeat dimeric RBD-based protein subunit vaccine  
633       (ZF2001) against COVID-19 in adults: two randomised, double-blind, placebo-  
634       controlled, phase 1 and 2 trials. *Lancet Infect Dis.* 2021;21: 1107–1119.  
635       doi:10.1016/S1473-3099(21)00127-4
- 636   23.   Yang J, Wang W, Chen Z, Lu S, Yang F, Bi Z, et al. A vaccine targeting the  
637       RBD of the S protein of SARS-CoV-2 induces protective immunity. *Nat* 2020  
638       5867830. 2020;586: 572–577. doi:10.1038/s41586-020-2599-8

- 639 24. Zhang N-N, Li X-F, Deng Y-Q, Zhao H, Huang Y-J, Yang G, et al. A  
640 Thermostable mRNA Vaccine against COVID-19. *Cell*. 2020;182: 1271-  
641 1283.e16. doi:10.1016/j.cell.2020.07.024
- 642 25. Heinz FX, Stiasny K. Distinguishing features of current COVID-19 vaccines:  
643 knowns and unknowns of antigen presentation and modes of action. *npj*  
644 *Vaccines*. 2021;6: 104. doi:10.1038/s41541-021-00369-6
- 645 26. Berger I, Schaffitzel C. The SARS-CoV-2 spike protein: balancing stability and  
646 infectivity. *Cell Res*. 2020;30: 1059–1060. doi:10.1038/s41422-020-00430-4
- 647 27. Li T, Zheng Q, Yu H, Wu D, Xue W, Xiong H, et al. SARS-CoV-2 spike  
648 produced in insect cells elicits high neutralization titres in non-human primates.  
649 *Emerg Microbes Infect*. 2020;9: 2076–2090. doi:10.1080/22221751.2020.1821583
- 650 28. Dalvie NC, Rodriguez-Aponte SA, Hartwell BL, Tostanoski LH, Biedermann  
651 AM, Crowell LE, et al. Engineered SARS-CoV-2 receptor binding domain  
652 improves manufacturability in yeast and immunogenicity in mice. *Proc Natl*  
653 *Acad Sci U S A*. 2021;118. doi:10.1073/PNAS.2106845118
- 654 29. Malladi SK, Patel UR, Rajmani RS, Singh R, Pandey S, Kumar S, et al.  
655 Immunogenicity and Protective Efficacy of a Highly Thermotolerant, Trimeric  
656 SARS-CoV-2 Receptor Binding Domain Derivative. *ACS Infect Dis*. 2021;7:  
657 2546–2564. doi:10.1021/acsinfecdis.1c00276
- 658 30. Xia S, Zhu Y, Liu M, Lan Q, Xu W, Wu Y, et al. Fusion mechanism of 2019-  
659 nCoV and fusion inhibitors targeting HR1 domain in spike protein. *Cell Mol*  
660 *Immunol* 2020 177. 2020;17: 765–767. doi:10.1038/s41423-020-0374-2
- 661 31. Dejnirattisai W, Zhou D, Ginn HM, Duyvesteyn HME, Supasa P, Case JB, et al.

- 662           The antigenic anatomy of SARS-CoV-2 receptor binding domain. *Cell*.  
663           2021;184: 2183-2200.e22. doi:10.1016/J.CELL.2021.02.032
- 664   32.   Hitchman RB, Possee RD, Siaterli E, Richards KS, Clayton AJ, Bird LE, et al.  
665           Improved expression of secreted and membrane-targeted proteins in insect cells.  
666           *Biotechnol Appl Biochem*. 2010;56: 85–93. doi:10.1042/BA20090130
- 667   33.   Ellis D, Brunette N, Crawford KHD, Walls AC, Pham MN, Chen C, et al.  
668           Stabilization of the SARS-CoV-2 Spike Receptor-Binding Domain Using Deep  
669           Mutational Scanning and Structure-Based Design. *Front Immunol*. 2021;0: 2605.  
670           doi:10.3389/FIMMU.2021.710263
- 671   34.   Calabro S, Tritto E, Pezzotti A, Taccone M, Muzzi A, Bertholet S, et al. The  
672           adjuvant effect of MF59 is due to the oil-in-water emulsion formulation, none of  
673           the individual components induce a comparable adjuvant effect. *Vaccine*.  
674           2013;31: 3363–3369. doi:10.1016/j.vaccine.2013.05.007
- 675   35.   Knudsen NPH, Olsen A, Buonsanti C, Follmann F, Zhang Y, Coler RN, et al.  
676           Different human vaccine adjuvants promote distinct antigen-independent  
677           immunological signatures tailored to different pathogens. *Sci Rep*. 2016;6:  
678           19570. doi:10.1038/srep19570
- 679   36.   Zhang J, Miao J, Han X, Lu Y, Deng B, Lv F, et al. Development of a novel oil-  
680           in-water emulsion and evaluation of its potential adjuvant function in a swine  
681           influenza vaccine in mice. *BMC Vet Res*. 2018;14: 415. doi:10.1186/s12917-  
682           018-1719-2
- 683   37.   Leenaars PPAM, Koedam MA, Wester PW, Baumans V, Claassen E, Hendriksen  
684           CFM. Assessment of side effects induced by injection of different  
685           adjuvant/antigen combinations in rabbits and mice. *Lab Anim*. 1998;32: 387–

- 686 406. doi:10.1258/002367798780599884
- 687 38. Arunachalam PS, Walls AC, Golden N, Atyeo C, Fischinger S, Li C, et al.  
688 Adjuvanting a subunit COVID-19 vaccine to induce protective immunity. *Nature*.  
689 2021;594: 253–258. doi:10.1038/s41586-021-03530-2
- 690 39. Tostanoski LH, Wegmann F, Martinot AJ, Loos C, McMahan K, Mercado NB, et  
691 al. Ad26 vaccine protects against SARS-CoV-2 severe clinical disease in  
692 hamsters. *Nat Med* 2020 2611. 2020;26: 1694–1700. doi:10.1038/s41591-020-  
693 1070-6
- 694 40. Addetia A, Crawford KHD, Dingens A, Zhu H, Roychoudhury P, Huang ML, et  
695 al. Neutralizing antibodies correlate with protection from SARS-CoV-2 in  
696 humans during a fishery vessel outbreak with a high attack rate. *J Clin Microbiol*.  
697 2020;58. doi:10.1128/JCM.02107-20
- 698 41. Arifin WN, Zahiruddin WM. Sample Size Calculation in Animal Studies Using  
699 Resource Equation Approach. *Malaysian J Med Sci*. 2017;24: 101–105.  
700 doi:10.21315/mjms2017.24.5.11
- 701 42. Vogel AB, Kanevsky I, Che Y, Swanson KA, Muik A, Vormehr M, et al.  
702 BNT162b vaccines protect rhesus macaques from SARS-CoV-2. *Nature*.  
703 2021;592: 283–289. doi:10.1038/s41586-021-03275-y
- 704 43. Percie du Sert N, Hurst V, Ahluwalia A, Alam S, Avey MT, Baker M, et al. The  
705 ARRIVE guidelines 2.0: Updated guidelines for reporting animal research. *PLOS*  
706 *Biol*. 2020;18: e3000410. doi:10.1371/journal.pbio.3000410
- 707
- 708

709

710

711

712 Figure 1

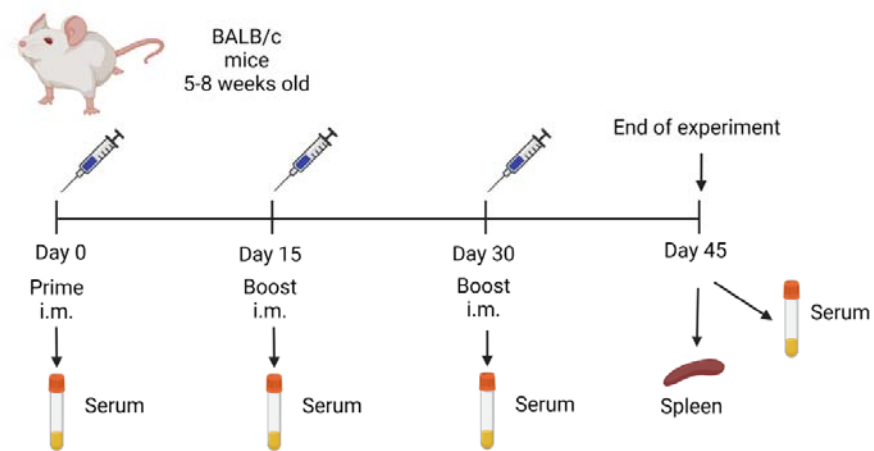

713

714 Figure 2

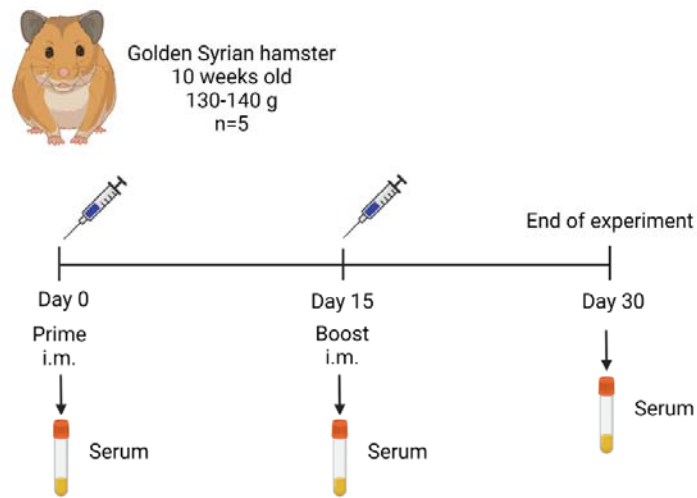

715

716 Figure 3

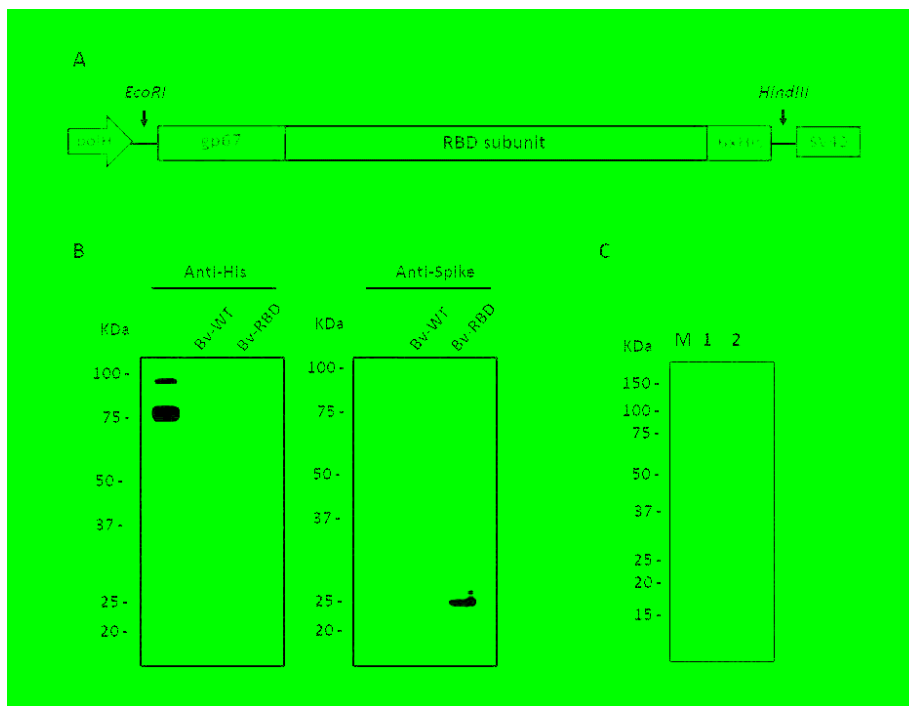

717

718 Figure 4



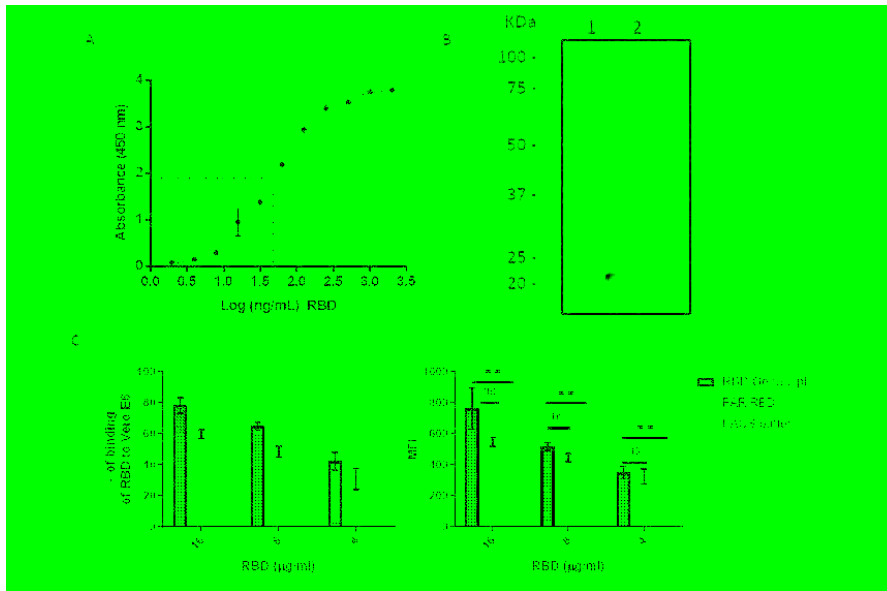

719

720

721

722 Figure 5

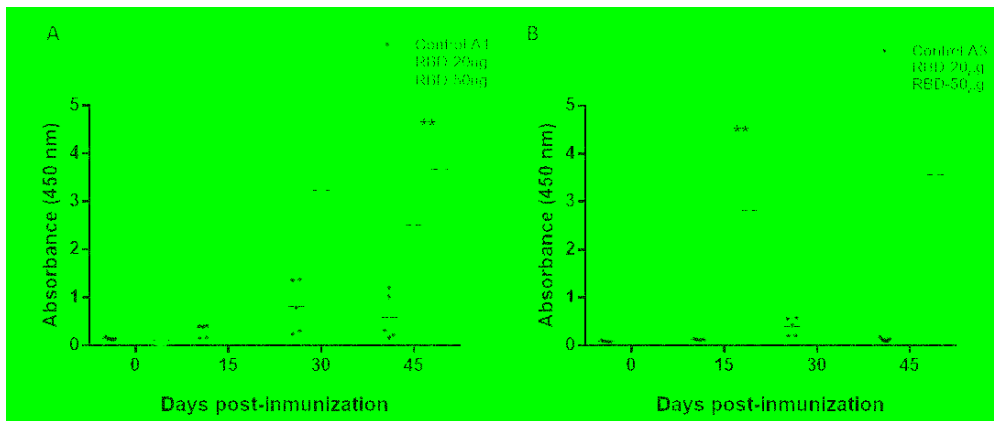

723

724 Figure 6

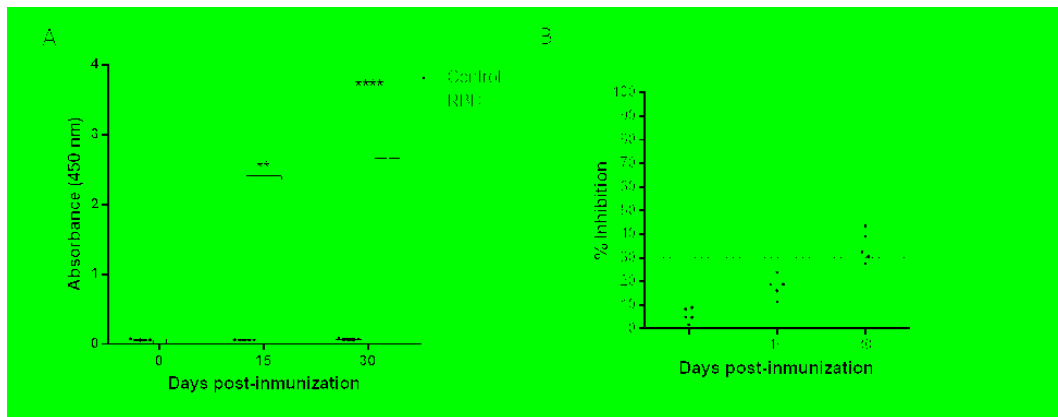

725

726 Figure 7

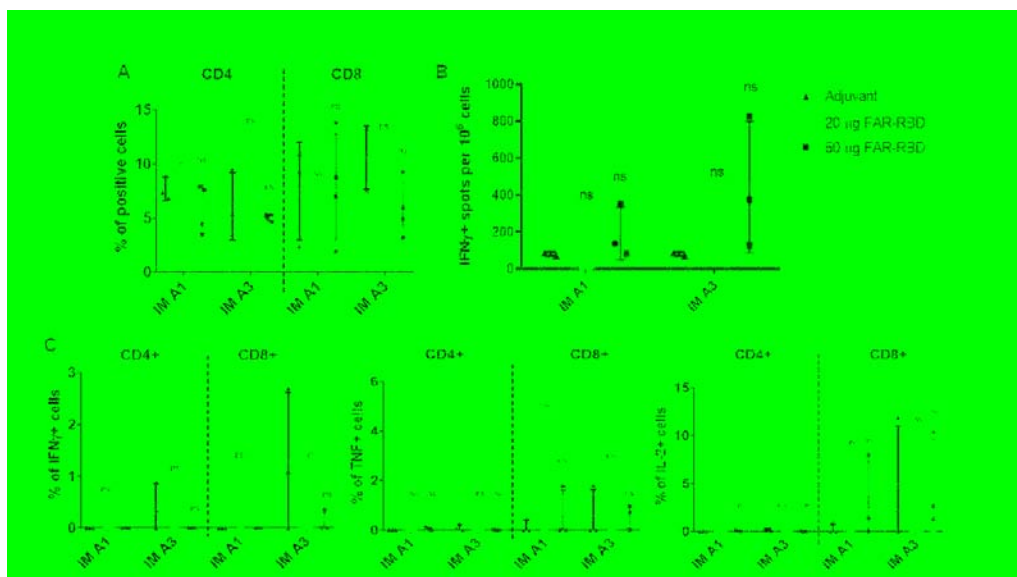

727

728 Figure 8

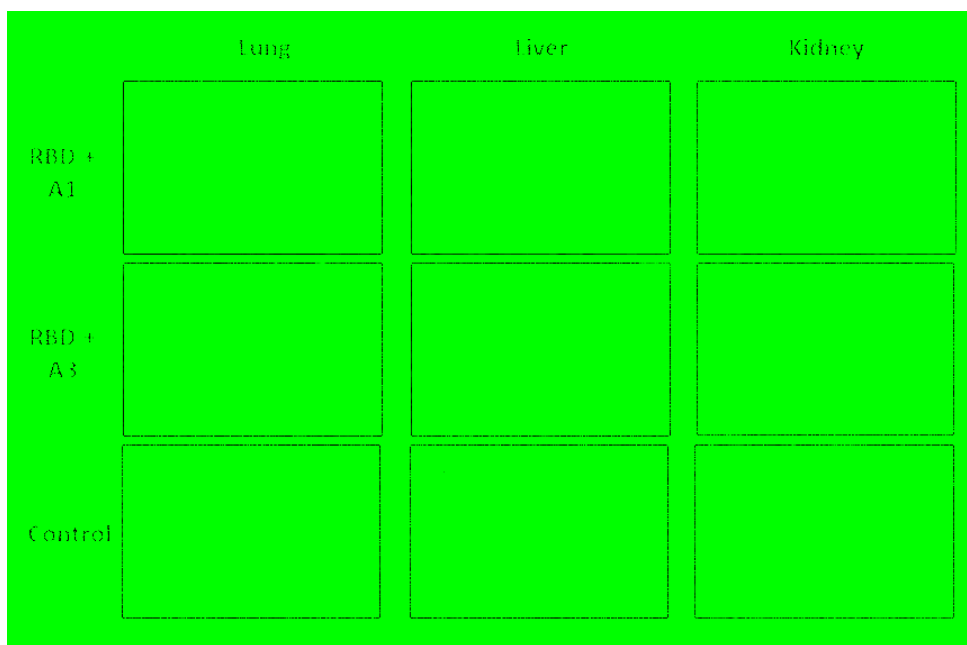

729
